# Supplementary material for: Preoperative, Operative, and Immediate Postoperative Predictors of Onset of Low Cardiac Output Syndrome in Congenital Heart Disease
Source: Research Square preprint supplement (doi:10.21203/rs.3.rs-8080625/v1), 2025-11-23
Supplement: Supplementary file 2 [file 2f943911304c47b02adef3c7.docx]

| Table 1. Demographic and preoperative characteristics by LCOS status | | | | |
| --- | --- | --- | --- | --- |
|  | **LCOS** | |  |  |
|  | **No** | **Yes** | **P Value** | **Correlationa** |
| Male (%) | 81 (55.8) | 30 (65.2) | 0.34 |  |
| Patient age expressed in days, median (IQR) | 1162 (148-4172) | 123 (8-497) | <0.001 | -0.36b |
| Patient’s weight at the time of surgery (kg), median (IQR) | 13.4 (5.8-39.1) | 4.9 (3.1-8.9) | <0.001 | -0.36b |
| Prematurity, n (%) | 15 (10.3) | 8 (17.4) | 0.088 | 0.19 |
| Genetic Anomaly, n (%) | 38 (26.2) | 14 (30.4) | 0.126 | 0.07 |
| Single Ventricle, n (%) | 12 (8.3) | 17 (37) | <0.001 | 0.58 |
| Diagnostic Group, n (%)c |  |  | NNA |  |
| AS | 10 (6.9) | 0 (0) |  |  |
| ASD | 12 (8.3) | 0 (0) |  |  |
| AVC | 9 (6.2) | 2 (4.4) |  |  |
| CHD | 4 (2.8) | 2 (4.4) |  |  |
| CM | 4 (2.8) | 2 (4.4) |  |  |
| COA | 9 (6.2) | 2 (4.4) |  |  |
| D-TGA | 4 (2.8) | 2 (4.4) |  |  |
| DORV | 1 (0.7) | 3 (6.5) |  |  |
| HLHS | 5 (3.5) | 12 (26.1) |  |  |
| PA | 3 (2.1) | 4 (8.7) |  |  |
| TA | 1 (0.7) | 1 (2.2) |  |  |
| TOF | 13 (9) | 2 (4.4) |  |  |
| VSD | 50 (34.5) | 12 (26.1) |  |  |
| Other | 20 (13.8) | 2 (4.4) |  |  |
| Preop Intubation n (%) | 6 (4.1) | 17 (37) | <0.001 | 0.72 |
| Preop Inotrope, n (%) | 14 (9.7) | 15 (32.6) | <0.001 | 0.48 |
| Prior Cardiac Surgeries, n (%) | 44 (30.3) | 19 (41.3) | 0.23 |  |
| Preop Bidirectional, n (%) | 24 (16.6) | 12 (26.1) | 0.06 | 0.19 |

**Table 1.** aTetrachoric Correlations unless otherwise specified, bPoint-Biseral Correlation, cno comparison statistics were run. Abbreviations: Aortic-valve stenosis (AS), Atrial septal defect (ASD), Coarctation of the aorta (CoA), Dextro-transposition of the great arteries (D-TGA), Double-outlet right ventricle (DORV), Hypoplastic left heart syndrome (HLHS), Interrupted aortic arch (IAA), Pulmonary atresia (PA), Tetralogy of Fallot (TOF), Tricuspid-valve atresia (TA), Ventricular septal defect (VSD), Interquartile range (IQR).
