# Supplementary material for: Preoperative, Operative, and Immediate Postoperative Predictors of Onset of Low Cardiac Output Syndrome in Congenital Heart Disease
Source: Research Square preprint supplement (doi:10.21203/rs.3.rs-8080625/v1), 2025-11-23
Supplement: Supplementary file 3 [file 8cd0961bdb43517c22e3a032.docx]

| Table 2. Operative and Immediate postoperative characteristics by LCOS status | | | | |
| --- | --- | --- | --- | --- |
|  | **LCOS** | |  |  |
|  | **No** | **Yes** | **P Value** | **Correlationa** |
| Heart Transplant, n (%) | 1 (0.7) | 4 (8.7) | 0.012 | 0.6 |
| RACHS1 >4 (high), n (%) | 15 (10.3) | 24 (52.2) | <0.001 | 0.68 |
| STAT >3 (high), n (%) | 43 (29.7) | 30 (65.2) | <0.001 | 0.51 |
| Open Sternum, n (%) | 2 (1.4) | 17 (37) | <0.001 | 0.84 |
| Residual Shunt, n (%) | 22 (15.2) | 8 (17.4) | 0.168 | 0.05 |
| Total cardiopulmonary bypass duration, in minutes, median (IQR) | 76 (56-108) | 117 (88-153) | <0.001 | 0.35b |
| Aortic cross-clamp time, in minutes, median (IQR) | 48 (32-82) | 72 (47-89) | 0.052 | 0.14b |
| Duration of circulatory arrest during bypass, in minutes, median (IQR) | 0 (0-0) | 0 (0-0) | N/Ac | N/A |

**Table2.** aTetrachoric Correlations unless otherwise specified; bPoint-Biseral Correlation; c90% of both groups had zero duration
