# Supplementary material for: Preoperative, Operative, and Immediate Postoperative Predictors of Onset of Low Cardiac Output Syndrome in Congenital Heart Disease
Source: Research Square preprint supplement (doi:10.21203/rs.3.rs-8080625/v1), 2025-11-23
Supplement: Supplementary file 4 [file be446f61efb0dc3d0df0ae63.docx]

| Table 3. Multivariable model predicting Low Cardiac Output Syndrome. | | |
| --- | --- | --- |
|  | AOR (CL) | P Value |
| *Full Model* |  |  |
| Natural‐logarithm transform of patient age in days | 0.79 (0.56-1.12) | 0.181 |
| Prematurity (Ref=No) | 1.44 (0.4-5.19) | 0.576 |
| Single Ventricle (Ref=No) | 1.64 (0.43-6.24) | 0.47 |
| Number of Prior Cardiac Surgeries | 2 (1.15-3.47) | 0.014 |
| Patient’s weight at the time of surgery (kg) | 0.96 (0.9-1.01) | 0.124 |
| Preop Inotrope, n (%) | 2.7 (0.92-7.98) | 0.071 |
| Having a RACHS-1 score of 4 or above (Ref=No) | 3.61 (1.09-11.9) | 0.035 |
| STAT score of 3 or above | 0.53 (0.16-1.79) | 0.305 |
| Preop Bidirectional (Ref=No) | 1.33 (0.46-3.85) | 0.596 |
| Total cardiopulmonary bypass duration, in minutes | 1.02 (1-1.04) | 0.039 |
| Aortic cross-clamp time, in minutes | 0.99 (0.97-1.01) | 0.422 |
| Pseudo R2=0.33 |  |  |
|  |  |  |
| *Trimmed Model* |  |  |
| Number of Prior Cardiac Surgeries | 2.00 (1.34-2.97) | <0.001 |
| Patient’s weight at the time of surgery (kg) | 0.92 (0.87-0.97) | 0.004 |
| On a Preoperative Inotrope (Ref=No) | 2.75 (1.02-7.43) | 0.046 |
| Having a RACHS-1 score of 4 or above (Ref=No) | 3.69 (1.38-9.81) | 0.009 |
| Total cardiopulmonary bypass duration | 1.01 (1.00-1.02) | 0.014 |

**Table 3.** Multivariable logistic regression models predicting low cardiac output syndrome (LCOS). The Full model includes all candidate predictors meeting inclusion criteria, while the Trimmed model presents the most parsimonious set of independent predictors. Significant variables in the final model included number of prior cardiac surgeries, lower body weight, preoperative inotrope use, higher RACHS-1 category, and longer cardiopulmonary bypass duration. The final regression equation was: *logit(p) = −2.45 + 0.69 × (Number of Prior Surgeries) − 0.04 × (Weight at Surgery) + 1.01 × (Preop Inotrope) + 1.30 × (RACHS-1 ≥ 4) + 0.013 × (CPB Time).*
